# Supplementary material for: Optimizing the use of expert panel reference diagnoses in diagnostic studies of multidimensional syndromes
Source: Springer Nature journal article supplement (doi:10.1186/s12883-014-0190-3), 2014-10-03
Supplement: MOESM1 [file 9742068]

# Additional file 1: Example fictive patient vignette

| STAGE B INFORMATION (available information to set the reference diagnosis)     |                                                                                                                                                                                                                                                                                                                                                                                                                             |                                                                                                                                                                                                                                                                                                 |                                                                                                                                                                                                                                                                    |
|--------------------------------------------------------------------------------|-----------------------------------------------------------------------------------------------------------------------------------------------------------------------------------------------------------------------------------------------------------------------------------------------------------------------------------------------------------------------------------------------------------------------------|-------------------------------------------------------------------------------------------------------------------------------------------------------------------------------------------------------------------------------------------------------------------------------------------------|--------------------------------------------------------------------------------------------------------------------------------------------------------------------------------------------------------------------------------------------------------------------|
| STAGE A INFORMATION (available information to set the care-as-usual diagnosis) |                                                                                                                                                                                                                                                                                                                                                                                                                             |                                                                                                                                                                                                                                                                                                 |                                                                                                                                                                                                                                                                    |
|                                                                                | Baseline                                                                                                                                                                                                                                                                                                                                                                                                                    | 1-year follow-up                                                                                                                                                                                                                                                                                | 2-year follow-up                                                                                                                                                                                                                                                   |
| Age                                                                            | 78                                                                                                                                                                                                                                                                                                                                                                                                                          |                                                                                                                                                                                                                                                                                                 |                                                                                                                                                                                                                                                                    |
| Gender                                                                         | female                                                                                                                                                                                                                                                                                                                                                                                                                      |                                                                                                                                                                                                                                                                                                 |                                                                                                                                                                                                                                                                    |
| Education                                                                      | Higher Professional Education                                                                                                                                                                                                                                                                                                                                                                                               |                                                                                                                                                                                                                                                                                                 |                                                                                                                                                                                                                                                                    |
| Marital state                                                                  | Married                                                                                                                                                                                                                                                                                                                                                                                                                     |                                                                                                                                                                                                                                                                                                 |                                                                                                                                                                                                                                                                    |
| Patient and informal caregiver history                                         | Patient indicates that everything requires a bit more time before things get through to her. Exercise is difficult since her stiff muscles. She indicates her memory is good and concentration during reading is good if there is sufficient interest in the topic. She noticed to loose stuff more often. According to her husband memory and orientation in time has declined. When providing clues she remembers things. | Patient indicates to have trouble hearing. She does not indicate a memory decline. Husband reports further decline of memory, especially short-term memory. Furthermore he things she is disorientated and she does not ask for help by asking things again if she did not hear it well enough. | Patient indicates that memory has declined. Sleeping is ok but she lost appetite. She can't name her daily activities. According to husband and son physical functioning has declined. Orientation is difficult. Husband has to help the patient with many things. |
| Beginning Course                                                               | Gradual                                                                                                                                                                                                                                                                                                                                                                                                                     |                                                                                                                                                                                                                                                                                                 |                                                                                                                                                                                                                                                                    |
| 1st or 2nd degree relatives with dementia                                      | 0                                                                                                                                                                                                                                                                                                                                                                                                                           | Progressive                                                                                                                                                                                                                                                                                     | Progressive                                                                                                                                                                                                                                                        |
| 1st or 2nd degree relatives with Parkinson                                     | 1                                                                                                                                                                                                                                                                                                                                                                                                                           |                                                                                                                                                                                                                                                                                                 |                                                                                                                                                                                                                                                                    |
| 1st or 2nd degree relatives with motor neuron disease                          | 0                                                                                                                                                                                                                                                                                                                                                                                                                           |                                                                                                                                                                                                                                                                                                 |                                                                                                                                                                                                                                                                    |
| Mini-mental State Examination (MMSE)                                           | 30/30                                                                                                                                                                                                                                                                                                                                                                                                                       | 26/30                                                                                                                                                                                                                                                                                           | 22/30                                                                                                                                                                                                                                                              |
| Clinical Dementia Rating scale (CDR)                                           | 0.5                                                                                                                                                                                                                                                                                                                                                                                                                         | 0.5                                                                                                                                                                                                                                                                                             | 1                                                                                                                                                                                                                                                                  |
| Neuropsychiatric inventory (NPI)                                               | 0/144                                                                                                                                                                                                                                                                                                                                                                                                                       | 0/144                                                                                                                                                                                                                                                                                           | 0/144                                                                                                                                                                                                                                                              |
| Geriatric depression scale (GDS-15)                                            | 1/15                                                                                                                                                                                                                                                                                                                                                                                                                        | 0/15                                                                                                                                                                                                                                                                                            | 1/15                                                                                                                                                                                                                                                               |
| Disability assessment for Dementia (DAD)                                       | 100% initiative<br>100% planning & organisation<br>94% effective implementation                                                                                                                                                                                                                                                                                                                                             | 98% initiative<br>100% planning & organisation<br>91% effective implementation                                                                                                                                                                                                                  | 84% initiative<br>92% planning & organisation<br>76% effective implementation                                                                                                                                                                                      |
| Disability assessment for Dementia (total score)                               | 98%                                                                                                                                                                                                                                                                                                                                                                                                                         | 96%                                                                                                                                                                                                                                                                                             | 84%                                                                                                                                                                                                                                                                |
| Obese                                                                          | No                                                                                                                                                                                                                                                                                                                                                                                                                          | No                                                                                                                                                                                                                                                                                              | No                                                                                                                                                                                                                                                                 |
| Hypertension                                                                   | No                                                                                                                                                                                                                                                                                                                                                                                                                          | No                                                                                                                                                                                                                                                                                              | No                                                                                                                                                                                                                                                                 |
| Extrapyramidal Symptoms                                                        | No                                                                                                                                                                                                                                                                                                                                                                                                                          | No                                                                                                                                                                                                                                                                                              | Yes, tremble of hand                                                                                                                                                                                                                                               |
| Walking difficulties                                                           | Yes, small steps                                                                                                                                                                                                                                                                                                                                                                                                            | No, walks with small steps                                                                                                                                                                                                                                                                      | No, walks with small steps                                                                                                                                                                                                                                         |
| Focal neurological problems                                                    | No                                                                                                                                                                                                                                                                                                                                                                                                                          | No                                                                                                                                                                                                                                                                                              | No                                                                                                                                                                                                                                                                 |
| non-fluent speech                                                              | No                                                                                                                                                                                                                                                                                                                                                                                                                          | No                                                                                                                                                                                                                                                                                              | No                                                                                                                                                                                                                                                                 |
| other neurological problems                                                    | No                                                                                                                                                                                                                                                                                                                                                                                                                          | No                                                                                                                                                                                                                                                                                              | No                                                                                                                                                                                                                                                                 |
| Somatic                                                                        | Coronary bypass, diabetes                                                                                                                                                                                                                                                                                                                                                                                                   | Coronary bypass, diabetes                                                                                                                                                                                                                                                                       | Coronary bypass, diabetes, hearing problems                                                                                                                                                                                                                        |
| Smoker                                                                         | Never smoked                                                                                                                                                                                                                                                                                                                                                                                                                | Never smoked                                                                                                                                                                                                                                                                                    | Never smoked                                                                                                                                                                                                                                                       |
| Amount of tobacco                                                              | [not applicable]                                                                                                                                                                                                                                                                                                                                                                                                            | [not applicable]                                                                                                                                                                                                                                                                                | [not applicable]                                                                                                                                                                                                                                                   |
| Drinks alcohol                                                                 | Yes                                                                                                                                                                                                                                                                                                                                                                                                                         | [unknown]                                                                                                                                                                                                                                                                                       | Yes                                                                                                                                                                                                                                                                |
| Amount of alcohol per week                                                     | 5                                                                                                                                                                                                                                                                                                                                                                                                                           | [unknown]                                                                                                                                                                                                                                                                                       | 1                                                                                                                                                                                                                                                                  |
| Medication use                                                                 | Acetylcardio, ascal, metformine                                                                                                                                                                                                                                                                                                                                                                                             | Acetylcardio, ascal, metformine                                                                                                                                                                                                                                                                 | Acetylcardio, ascal, metformine                                                                                                                                                                                                                                    |

|                                                 | RAW SCORE                                                                                                                        | Z-SCORE | INTERPRET     |
|-------------------------------------------------|----------------------------------------------------------------------------------------------------------------------------------|---------|---------------|
| 15-Word Learning Task (WLT) total               | 1+3+4+ 5+6=25                                                                                                                    | -2.5    | Very low      |
| 15-WLT delayed recall                           | 4                                                                                                                                | -1.6    | Low           |
| 15-WLT retention (trial 5)                      | 4 / 5                                                                                                                            | 0.36    | Average       |
| 15-WLT retention (max. score)                   | 4 / 6                                                                                                                            | -0.17   | Average       |
| 15-WLT recognition                              | 13-2=11                                                                                                                          | -0.13   | Average       |
| Visual Association Test (correct)               | 12                                                                                                                               |         | Average       |
| Fluency                                         | 25                                                                                                                               | 0.05    | Average       |
| Digitspan                                       | 8 / 4                                                                                                                            |         | Average       |
| Visual Object and Space Perception Battery      | 18 / 9                                                                                                                           |         |               |
| Letter Digit Substitution Test (60 seconds)     | 19                                                                                                                               | -1.5    | Low           |
| Stroop Color-Word Test 1                        | 57                                                                                                                               | -1.6    | Low           |
| Stroop Color-Word Test 2                        | 87                                                                                                                               | -2.5    | Very low      |
| Stroop Color-Word Test 3                        | 180                                                                                                                              | -2.4    | Very low      |
| Stroop interference (3-((2+1)/2))               | 113                                                                                                                              | -2.1    | Very low      |
| Trail Making Test A                             | 90                                                                                                                               | -2.2    | Very low      |
| Trail Making Test B                             | 141                                                                                                                              | -0.64   | Below average |
| Trail Making Test B/A index                     | 1.52                                                                                                                             |         |               |
| Conclusion neuropsychological examination       | The neuropsychological examination indicates a low mental speed. Memory performance is average except active information uptake. |         |               |
| Medial temporal lobe atrophy -score left (0-4)  | 2                                                                                                                                |         |               |
| Medial temporal lobe atrophy -score right (0-4) | 2                                                                                                                                |         |               |
| Global cortical atrophy (0-3)                   | 1                                                                                                                                |         |               |
| White matter lesions (Fazekas) (0-3)            | 1                                                                                                                                |         |               |
| Infarcts                                        | 0                                                                                                                                |         |               |
| Lacunes                                         | 0                                                                                                                                |         |               |
| Microbleeds                                     | 0                                                                                                                                |         |               |
| Other clinically relevant findings              | [not applicable]                                                                                                                 |         |               |

| RAW SCORE                                                                                                                                                  | Z-SCORE | INTERPRET     | RAW SCORE                                                                                                    | Z-SCORE   | INTERPRET     |
|------------------------------------------------------------------------------------------------------------------------------------------------------------|---------|---------------|--------------------------------------------------------------------------------------------------------------|-----------|---------------|
| 3+4+6+                                                                                                                                                     |         |               | 3+4+4+                                                                                                       |           |               |
| 6+7=26                                                                                                                                                     | -1.6    | Low           | 5+3=19                                                                                                       | -2.4      | Very low      |
| 6                                                                                                                                                          | -0.60   | Below average | 3                                                                                                            | -1.9      | Low           |
| 6 / 7                                                                                                                                                      | 0.68    | Above average | 0 / 3                                                                                                        | -3.7      | Very low      |
| 6 / 7                                                                                                                                                      | 0.88    | Above average | 0 / 6                                                                                                        | -3.7      | Very low      |
| 14-1=13                                                                                                                                                    | 0.23    | Average       | 13-1=12                                                                                                      | 0.25      | Average       |
| 13                                                                                                                                                         |         | Average       | 11                                                                                                           |           | Below average |
| 11                                                                                                                                                         | -2      | Very low      | 12                                                                                                           | -1.7      | Low           |
| 8 / 3                                                                                                                                                      |         | Average       | 7 / 4                                                                                                        |           | Below average |
| 19 / 10                                                                                                                                                    |         |               | 20 / 10                                                                                                      |           |               |
| 20                                                                                                                                                         | -1.4    | Below average | 8                                                                                                            | -3.2      | Very low      |
| 57                                                                                                                                                         | -1.6    | Low           | 68.1                                                                                                         | -3.2      | Very low      |
| 87                                                                                                                                                         | -2.4    | Very low      | 103.5                                                                                                        | -3.7      | Very low      |
| 240                                                                                                                                                        | -4.9    | Very low      | 244.2                                                                                                        | -4.9      | Very low      |
| 169                                                                                                                                                        | -4.6    | Very low      | 195                                                                                                          | -4.7      | Very low      |
| 107                                                                                                                                                        | -2.5    | Very low      | 108                                                                                                          | -2.5      | Very low      |
| 215                                                                                                                                                        | -1.7    | Low           | [unknown]                                                                                                    | [unknown] | [unknown]     |
| 2.01                                                                                                                                                       |         |               | [unknown]                                                                                                    |           |               |
| The patient scores mainly low on tests of mental speed, attention/concentration and executive functioning. Compared to last year several domains declined. |         |               | Scores on mental speed are very low though stable compared to last year. Memory declined except recognition. |           |               |
